# Supplementary material
Source: MDPI journal article supplement (https://www.mdpi.com/2075-4701/13/12/1979)
Supplement: s1 [file s1]

## Article

# Mechanical Properties of Electrolytically Produced Copper Coatings Reinforced with Pigment Particles

Ivana O. Mladenović <sup>1</sup>, Marija M. Vuksanović <sup>2</sup>, Stevan P. Dimitrijević <sup>3</sup>, Rastko Vasilic <sup>4</sup>, Vesna J. Radojević <sup>5</sup>, Dana G. Vasiljević-Radović <sup>1</sup>, and Nebojša D. Nikolić <sup>1,\*</sup>

<sup>1</sup> University of Belgrade, Institute of Chemistry, Technology and Metallurgy, Njegoševa 12, 11 000 Belgrade, Serbia; ivana.mladenovic@ihtm.bg.ac.rs (I.O.M.); dana@nanosys.ihtm.bg.ac.rs (D.G.V.R.);

<sup>2</sup> University of Belgrade, VINČA Institute of Nuclear Sciences – National Institute of the Republic of Serbia, Belgrade, Serbia; marija.vuksanovic@vin.bg.ac.rs (M.M.V);

<sup>3</sup> University of Belgrade, Innovation Centre Faculty of Technology and Metallurgy, Karnegijeva 4, 11000 Belgrade, Serbia; sdimitrijevic@tmf.bg.ac.rs (S.P.D.);

<sup>4</sup> University of Belgrade, Faculty of Physics, Studentski Trg 12-16, 11 000 Belgrade, Serbia; rastko.vasilic@ff.bg.ac.rs (R.V.);

<sup>5</sup> University of Belgrade, Faculty of Technology and Metallurgy, Karnegijeva 4, 11 000 Belgrade, Serbia; vesnar@tmf.bg.ac.rs (V.J.R);

\* Correspondence: nnikolic@ihtm.bg.ac.rs (N.D.N.); <https://orcid.org/0000-0002-6385-5714>; Tel.: + 381 11 337 03 90

## Supplementary

The values of the composite and the calculated coating hardness by application of Chicot–Lesage composite hardness model (C–L CHM) for pure copper and various CuMC–PigP coatings

**Table S1.** The values of the composite,  $H_c$  and the coating hardness,  $H_{coat}$  calculated by application of C–L CHM for pure copper ( $c = 0$  wt %) and CuMC–PigP coatings with a concentration of the pigment particles of 0.50 and 1.00 wt %. RID – relative indentation depth;  $P$  – applied load.

| $P / N$ | $c = 0$ wt % |             |                | $c = 0.50$ wt % |             |                | $c = 1.00$ wt % |             |                |
|---------|--------------|-------------|----------------|-----------------|-------------|----------------|-----------------|-------------|----------------|
|         | RID          | $H_c / GPa$ | $H_{coat}/GPa$ | RID             | $H_c / GPa$ | $H_{coat}/GPa$ | RID             | $H_c / GPa$ | $H_{coat}/GPa$ |
| 0.04903 | 0.121118     | 0.664156    | 0.71593        | 0.090588        | 0.782356    | 0.902283       | 0.068425        | 0.865619    | 1.027192       |
| 0.09806 | 0.15528      | 0.808145    | 0.78677        | 0.111933        | 1.024857    | 1.064553       | 0.086782        | 1.076262    | 1.143398       |
| 0.19612 | 0.20000      | 0.974289    | 0.910716       | 0.151261        | 1.122424    | 1.114832       | 0.115287        | 1.219692    | 1.236984       |
| 0.24515 | 0.224638     | 0.965367    | 0.877815       | 0.162437        | 1.216601    | 1.206067       | 0.126836        | 1.259614    | 1.267543       |
| 0.39224 | 0.266046     | 1.101199    | 1.014576       | 0.201681        | 1.262727    | 1.239769       | 0.158211        | 1.295293    | 1.289841       |
| 0.4903  | 0.287267     | 1.180636    | 1.106959       | 0.218487        | 1.344916    | 1.332017       | 0.17223         | 1.366266    | 1.362313       |
| 0.63739 | 0.322878     | 1.214939    | 1.139544       | 0.243697        | 1.405365    | 1.403703       | 0.186916        | 1.508002    | 1.520152       |
| 0.88254 | 0.383023     | 1.195394    | 1.09294        | 0.277983        | 1.49549     | 1.52391        | 0.216956        | 1.549817    | 1.578189       |
| 0.9806  | 0.402692     | 1.201635    | 1.097312       | 0.300504        | 1.421926    | 1.425183       | 0.228438        | 1.553262    | 1.585819       |
| 1.4709  | 0.485507     | 1.239988    | 1.134589       | 0.369748        | 1.408827    | 1.408492       | 0.284846        | 1.498479    | 1.531893       |
| 1.9612  | 0.563147     | 1.228865    | 1.101482       | 0.422689        | 1.437361    | 1.453339       | 0.323097        | 1.552902    | 1.615885       |
| 2.9418  | 0.672878     | 1.291119    | 1.189684       | 0.529412        | 1.374397    | 1.347113       | 0.400534        | 1.515736    | 1.577841       |

**Table S2.** The values of the composite,  $H_c$  and the coating hardness,  $H_{coat}$  calculated by application of C-L CHM for CuMC-PigP coatings with a concentration of the pigment particles of 1.50 and 3.00 wt %. RID – relative indentation depth;  $P$  – applied load.

| $P / N$ | $c = 1.50 \text{ wt } \%$ |                    |                       | $c = 3.00 \text{ wt } \%$ |                    |                       |
|---------|---------------------------|--------------------|-----------------------|---------------------------|--------------------|-----------------------|
|         | RID                       | $H_c / \text{GPa}$ | $H_{coat}/\text{GPa}$ | RID                       | $H_c / \text{GPa}$ | $H_{coat}/\text{GPa}$ |
| 0.04903 | 0.062032                  | 0.952473           | 1.103057              | 0.05689                   | 1.122424           | 1.224458              |
| 0.09806 | 0.08019                   | 1.139896           | 1.202366              | 0.075853                  | 1.262727           | 1.299895              |
| 0.19612 | 0.107937                  | 1.258357           | 1.275661              | 0.104425                  | 1.332545           | 1.342202              |
| 0.24515 | 0.117841                  | 1.319641           | 1.327267              | 0.109671                  | 1.510125           | 1.499015              |
| 0.39224 | 0.146032                  | 1.374916           | 1.374664              | 0.136157                  | 1.567619           | 1.564674              |
| 0.4903  | 0.153968                  | 1.546032           | 1.550518              | 0.149368                  | 1.628225           | 1.632369              |
| 0.63739 | 0.174794                  | 1.559455           | 1.5728                | 0.166498                  | 1.703545           | 1.723908              |
| 0.88254 | 0.200                     | 1.649276           | 1.687658              | 0.192794                  | 1.759198           | 1.810378              |
| 0.9806  | 0.209524                  | 1.669721           | 1.718673              | 0.201643                  | 1.78686            | 1.851994              |
| 1.4709  | 0.260317                  | 1.62254            | 1.687999              | 0.246523                  | 1.793221           | 1.905448              |
| 1.9612  | 0.303937                  | 1.586993           | 1.659097              | 0.290771                  | 1.718645           | 1.842582              |
| 2.9418  | 0.374667                  | 1.566542           | 1.651889              | 0.362516                  | 1.658541           | 1.796041              |

The cathodic polarization curves for copper electrodeposition from the electrolytes without and with added the pigment particles

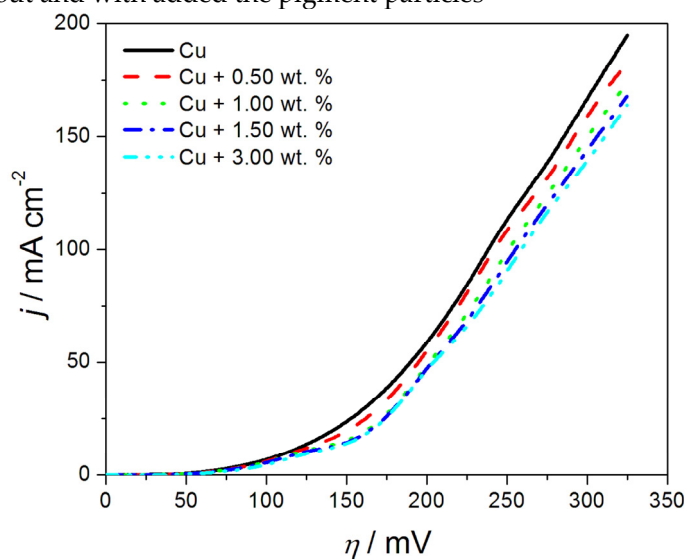

**Figure S1.** The cathodic polarization curves for Cu electrodeposition recorded from the pigment-free electrolyte, and from electrolytes with an addition of the pigment particles.

The working electrode (cathode): brass; The counter electrode (anode): copper; reference electrode: copper.

The electrolyte stirring: magnetic stirring (100 rpm).

Temperature: the room temperature.
